# Supplementary material for: Interplay of community dynamics, temperature, and productivity on the hydrogen isotope signatures of lipid biomarkers
Source: Copernicus journal article supplement (doi:10.5194/bg-14-3979-2017), 2017-09-14
Supplement: Supplementary file 1 [file bg-14-3979-2017-supplement.zip]

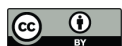

## *Supplement of*

# **Interplay of community dynamics, temperature, and productivity on the hydrogen isotope signatures of lipid biomarkers**

**S. Nemiah Ladd et al.**

*Correspondence to:* S. Nemiah Ladd ([nemiah.ladd@eawag.ch](mailto:nemiah.ladd@eawag.ch))

- [bg-14-3979-2017-supplement-title-page.pdf](#)
- Supplement
  - [SuppFig\\_1.pdf](#)
  - [Supplemental\\_file\\_2\\_plot\\_data.xlsx](#)

The copyright of individual parts of the supplement might differ from the CC BY 3.0 License.
