# Supplementary figures and images for: Interplay of community dynamics, temperature, and productivity on the hydrogen isotope signatures of lipid biomarkers
Source: Copernicus journal article supplement (doi:10.5194/bg-14-3979-2017), 2017-09-14

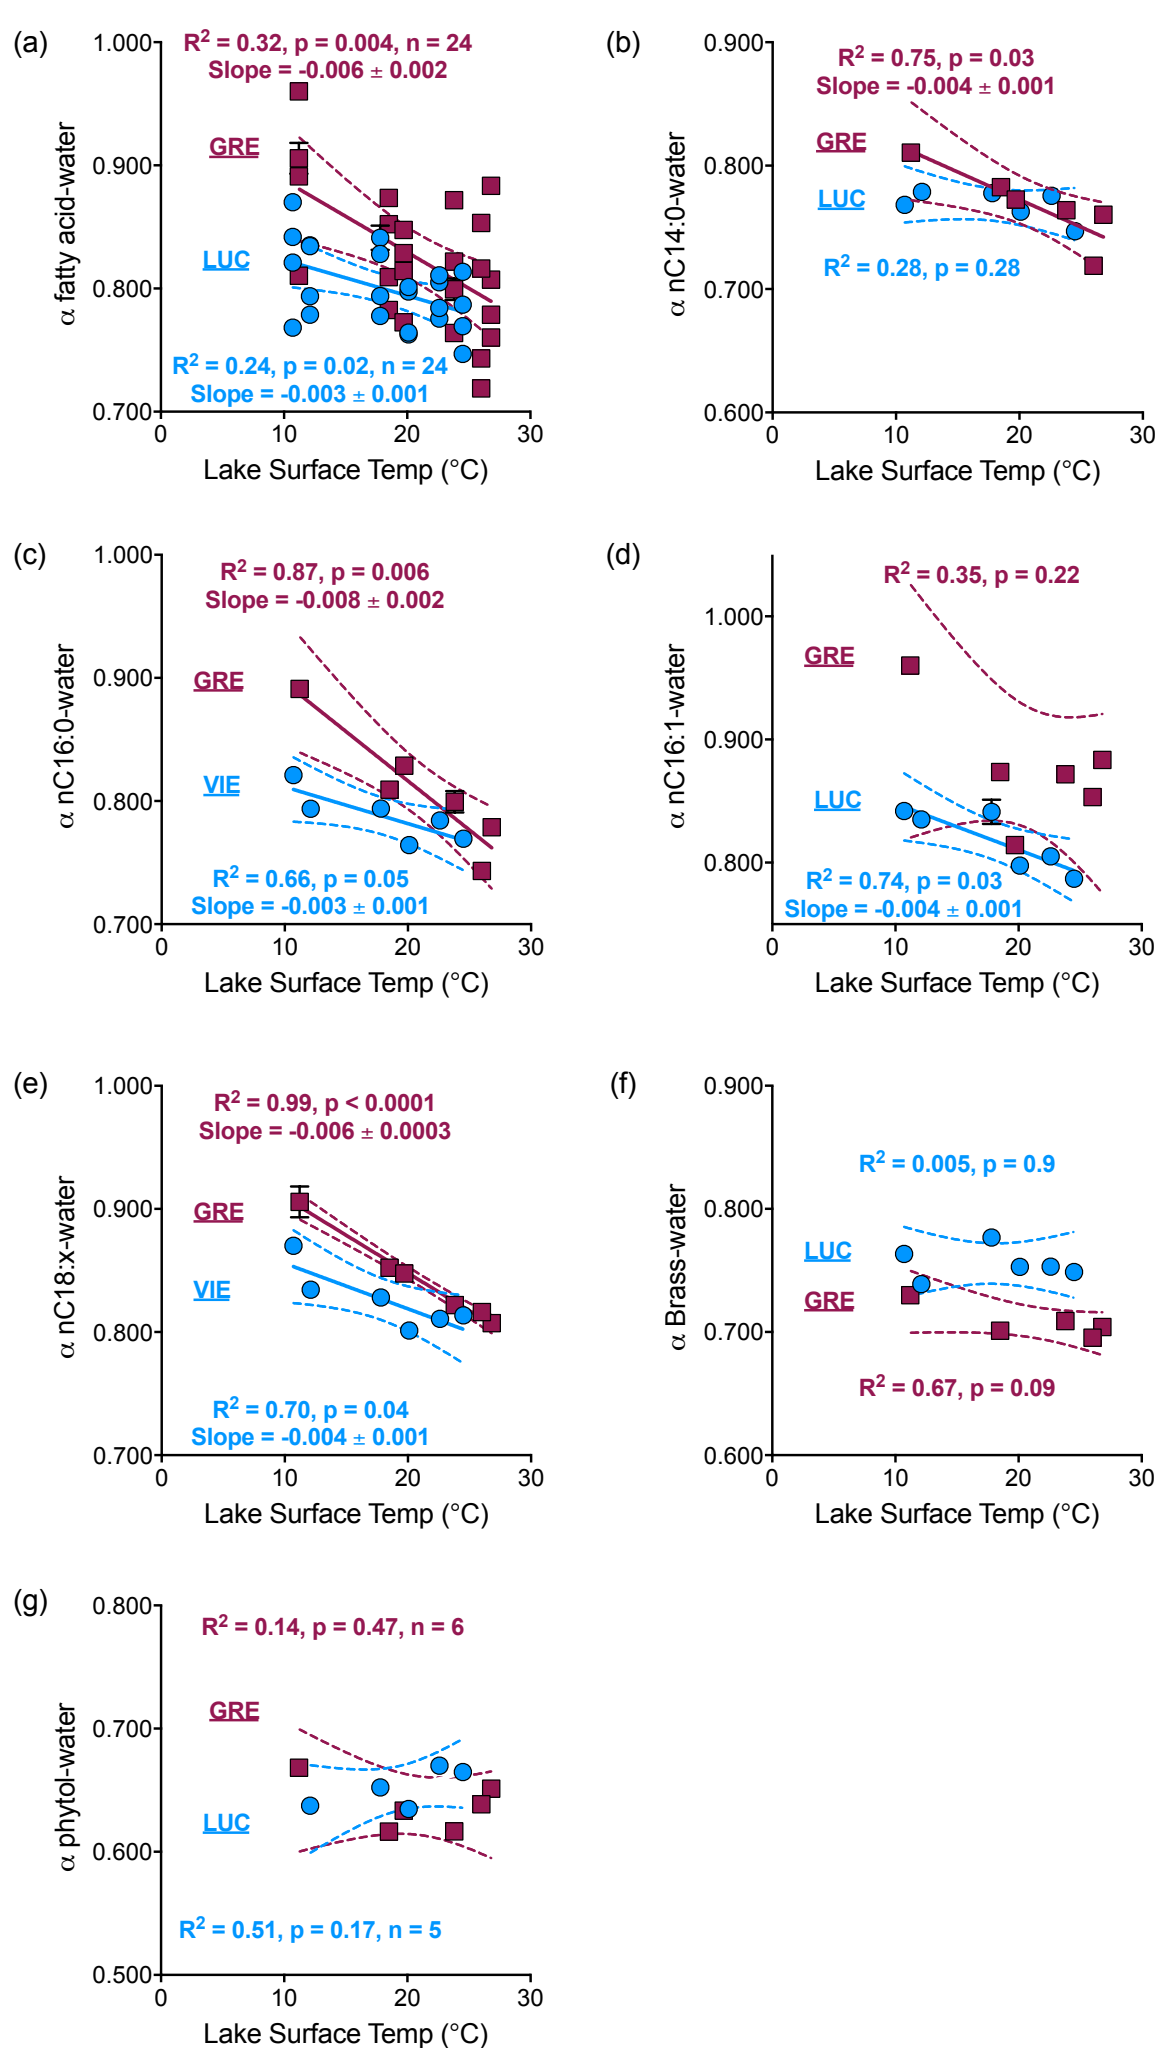

Supplement: Supplementary file 2 [file bg-14-3979-2017-supplement.zip]
